# Supplementary material
Source: PubMed Central journal article supplement (PMC5555182)
Supplement: 10.1074_M117.792887_jbc.M117.792887-1.pdf [file 10.1074_M117.792887_jbc.M117.792887-1.pdf]

SUPPLEMENTAL DATA

**Electrostatic control of intersegmental translocation by the ETS  
transcription factor ETV6**

June 4, 2017

Tam Vo<sup>1</sup>, Shuo Wang<sup>1</sup>, Gregory M. K. Poon<sup>1,2,\*</sup>, and W. David Wilson<sup>1,2,\*</sup>

<sup>1</sup> Department of Chemistry, Georgia State University, Atlanta, GA 30303

<sup>2</sup> Center for Diagnostics and Therapeutics, Georgia State University, Atlanta, GA 30303

\* To whom correspondence should be addressed at: P.O. Box 3965, Atlanta, GA 30302-3965.

Email: [gpoon@gsu.edu](mailto:gpoon@gsu.edu) and [wdw@gsu.edu](mailto:wdw@gsu.edu). Tel. (404) 413-5491 and (404) 413-5498.

**SUPPLEMENT INDEX****PAGE**

Supplemental Tables S1 to S3

S3

Supplemental Figure S1

S7

Supplemental references

S8

Table S1  
**SPR analysis of site-specific DNA binding by the ETS domain of ETV6**

Kinetic and equilibrium parameters for ETV6 binding to DNA<sup>SP</sup> in the absence and presence of salmon sperm DNA at the indicated total concentrations were estimated ( $\pm$  S.E.) according to a 1:1 binding model as previously reported and summarized in *Materials and Methods*. \*, Inferred from the equilibrium and dissociation rate constants.

*No salmon sperm DNA*

| [Na <sup>+</sup> ], x10 <sup>-3</sup> M | $k_a$ , x10 <sup>6</sup> M <sup>-1</sup> s <sup>-1</sup> | $k_d$ , x10 <sup>-3</sup> s <sup>-1</sup> | $K_D$ , x10 <sup>-9</sup> M |                  |
|-----------------------------------------|----------------------------------------------------------|-------------------------------------------|-----------------------------|------------------|
|                                         |                                                          |                                           | Kinetic fit                 | Steady-state     |
| 150                                     | 15.1 $\pm$ 0.02                                          | 7.34 $\pm$ 0.07                           | 0.5 $\pm$ 0.006             | 1.70 $\pm$ 0.16  |
| 200                                     | 5.78 $\pm$ 0.06                                          | 20.4 $\pm$ 0.2                            | 3.53 $\pm$ 0.05             | 5.92 $\pm$ 0.40  |
| 250                                     | 3.21 $\pm$ 0.02                                          | 47.7 $\pm$ 0.2                            | 14.9 $\pm$ 0.10             | 16.87 $\pm$ 0.38 |
| 300                                     | 1.67 $\pm$ 0.02                                          | 178.9 $\pm$ 1.8                           | 107.1 $\pm$ 1.53            | 99.94 $\pm$ 1.78 |
| 350                                     | 1.44 $\pm$ 0.04                                          | 483 $\pm$ 11                              | 335 $\pm$ 11.3              | 334.9 $\pm$ 1.38 |
| 400                                     | -                                                        | -                                         | -                           | 1048.6 $\pm$ 8.5 |

*10  $\mu$ M salmon sperm DNA*

| [Na <sup>+</sup> ], x10 <sup>-3</sup> M | $k_a$ , x10 <sup>5</sup> M <sup>-1</sup> s <sup>-1</sup> | $k_d$ , x10 <sup>-3</sup> s <sup>-1</sup> | $K_D$ , x10 <sup>-9</sup> M |                  |
|-----------------------------------------|----------------------------------------------------------|-------------------------------------------|-----------------------------|------------------|
|                                         |                                                          |                                           | Kinetic fit                 | Steady-state     |
| 125                                     | 3.45 $\pm$ 0.7                                           | 1.0 $\pm$ 0.5                             | 2.9 $\pm$ 1.5               | -                |
| 150                                     | 1.8 $\pm$ 0.3                                            | 1.4 $\pm$ 0.4                             | 8.2 $\pm$ 2.5               | 9.8 $\pm$ 1.2    |
| 200                                     | 6.8 $\pm$ 0.9*                                           | 10.8 $\pm$ 0.8                            | -                           | 15.7 $\pm$ 1.0   |
| 250                                     | 5.3 $\pm$ 0.8*                                           | 26.0 $\pm$ 0.4                            | -                           | 48.6 $\pm$ 0.8   |
| 300                                     | 12.4 $\pm$ 0.5                                           | 157.6 $\pm$ 0.7                           | 126.6 $\pm$ 2.1             | 132.9 $\pm$ 2.8  |
| 400                                     | -                                                        | -                                         | -                           | 1642.8 $\pm$ 5.4 |

**Table S1 (continued)**

*50  $\mu$ M salmon sperm DNA*

| [Na <sup>+</sup> ], x10 <sup>-3</sup> M | $k_a$ , x10 <sup>5</sup> M <sup>-1</sup> s <sup>-1</sup> | $k_d$ , x10 <sup>-3</sup> s <sup>-1</sup> | $K_D$ , x10 <sup>-9</sup> M |                |
|-----------------------------------------|----------------------------------------------------------|-------------------------------------------|-----------------------------|----------------|
|                                         |                                                          |                                           | Kinetic fit                 | Steady-state   |
| 125                                     | 2.1 ± 0.2                                                | 1.9 ± 0.1                                 | 8.9 ± 0.4                   | -              |
| 150                                     | 1.1 ± 0.4                                                | 2.1 ± 0.1                                 | 20.3 ± 0.7                  | -              |
| 200                                     | 6.8 ± 0.5*                                               | 10.8 ± 0.2                                | -                           | 15.2 ± 0.4     |
| 250                                     | 8.9 ± 0.6                                                | 31.2 ± 0.4                                | 35.1 ± 0.8                  | 33.3 ± 0.5     |
| 300                                     | 9.9 ± 0.8                                                | 117.6 ± 0.7                               | 118.7 ± 0.6                 | 125.1 ± 7.1    |
| 350                                     | 15.3 ± 0.4                                               | 493.2 ± 0.8                               | 320.4 ± 0.5                 | 342.0 ± 20.8   |
| 400                                     | -                                                        | -                                         | -                           | 1291.6 ± 166.0 |
| 450                                     | -                                                        | -                                         | -                           | 3674.5 ± 74.7  |

*100  $\mu$ M salmon sperm DNA*

| [Na <sup>+</sup> ], x10 <sup>-3</sup> M | $k_a$ , x10 <sup>5</sup> M <sup>-1</sup> s <sup>-1</sup> | $k_d$ , x10 <sup>-3</sup> s <sup>-1</sup> | $K_D$ , x10 <sup>-9</sup> M |              |
|-----------------------------------------|----------------------------------------------------------|-------------------------------------------|-----------------------------|--------------|
|                                         |                                                          |                                           | Kinetic fit                 | Steady-state |
| 100                                     | -                                                        | -                                         | -                           | 18.03 ± 1.7  |
| 150                                     | 1.1 ± 0.5                                                | 2.4 ± 0.2                                 | 21.3 ± 0.6                  | 25.0 ± 2.2   |
| 200                                     | 4.5 ± 0.3                                                | 21.8 ± 0.1                                | 49.1 ± 0.4                  | 55.3 ± 1.8   |
| 250                                     | 9.2 ± 0.6                                                | 69.4 ± 0.4                                | 75.6 ± 0.7                  | 77.2 ± 1.4   |
| 300                                     | 20.4 ± 0.7                                               | 231.4 ± 0.1                               | 113.4 ± 0.6                 | 113.0 ± 1.9  |
| 350                                     | 9.8 ± 0.4                                                | 458 ± 12                                  | 467 ± 23                    | 471 ± 64     |
| 400                                     | -                                                        | -                                         | -                           | 862 ± 30     |
| 450                                     | -                                                        | -                                         | -                           | 2890 ± 52    |

Table S2  
**Nonspecific DNA binding by the ETS domain of ETV6 to oligomeric DNA**

Equilibrium dissociation constants for ETV6 binding to the 23-bp nonspecific sites SD1 and SD2 (c.f. Table 1) were estimated ( $\pm$  S.E.) according to the McGhee-von Hippel equation modified for oligomeric DNA, Eq. **Error! Reference source not found.** in the main text. The binding site size was fixed at 5.2 according to the value determined by McIntosh and coworkers.<sup>1</sup> To constrain the fit for the binding data at high salt, each data set shared a common capacity ( $RU_{\max}$ ), whose fitted value corresponds to  $\sim 9$  equivalents of ETV6 per duplex hairpin, a reasonable value given for 23 bp if the protein was assumed to occupy only one face of the double helix as in its site-specific co-crystal structure (PDB: 4MHG).

| [Na <sup>+</sup> ], M | $K_D$ , mM                     |                     |
|-----------------------|--------------------------------|---------------------|
|                       | SD1                            | SD2                 |
| 0.15                  | 0.0069 $\pm$ 0.0004            | 0.0051 $\pm$ 0.0003 |
| 0.20                  | 0.030 $\pm$ 0.012              | 0.021 $\pm$ 0.001   |
| 0.25                  | 0.24 $\pm$ 0.02                | 0.18 $\pm$ 0.01     |
| 0.30                  | 0.76 $\pm$ 0.08                | 0.57 $\pm$ 0.05     |
| 0.40                  | 5.4 $\pm$ 3.2                  | 3.3 $\pm$ 1.3       |
| $RU_{\max}$           | 700 $\pm$ 14                   | 702 $\pm$ 13        |
| $\Delta m_{NS}$ (z)   | -6.8 $\pm$ 0.4 (7.7 $\pm$ 0.5) |                     |

Table S3

**Nonspecific DNA binding by the ETS domain of ETV6 to polymeric salmon sperm DNA**

Equilibrium dissociation constants for ETV6 binding to polymeric salmon sperm DNA in the presence of 0.05 M to 0.45 M NaCl were estimated ( $\pm$  S.E.) according to the McGhee-von Hippel equation, Eq. **Error! Reference source not found.** in the main text. In each fit, the binding site size was constrained at  $m = 5.2$  and  $[\text{ETV6}]_t = 200$  nM (known). \*,  $\omega$  fixed at unity, since no statistically significant improvement on the fit by letting  $\omega$  float (Fisher's F-test on sums of square,  $p = 0.05$ ).

| [NaCl], M                 | $K_D^{ns}$ , $\mu\text{M}$       | $\omega$                    |
|---------------------------|----------------------------------|-----------------------------|
| <b>0.125</b>              | $0.10 \pm 0.01$                  | 1*                          |
| <b>0.15</b>               | $0.29 \pm 0.16$                  | $31 \pm 1$                  |
| <b>0.20</b>               | $0.39 \pm 0.03$                  | $34 \pm 8$                  |
| <b>0.25</b>               | $0.41 \pm 0.04$                  | $31 \pm 6$                  |
| <b>0.30</b>               | $2.1 \pm 0.3$                    | $(6.7 \pm 4.0) \times 10^2$ |
| <b>0.45</b>               | $60 \pm 10$                      | $(10 \pm 2) \times 10^3$    |
| $\Delta m_{\text{NS}}(z)$ | $-4.5 \pm 0.9$ ( $5.1 \pm 1.0$ ) |                             |

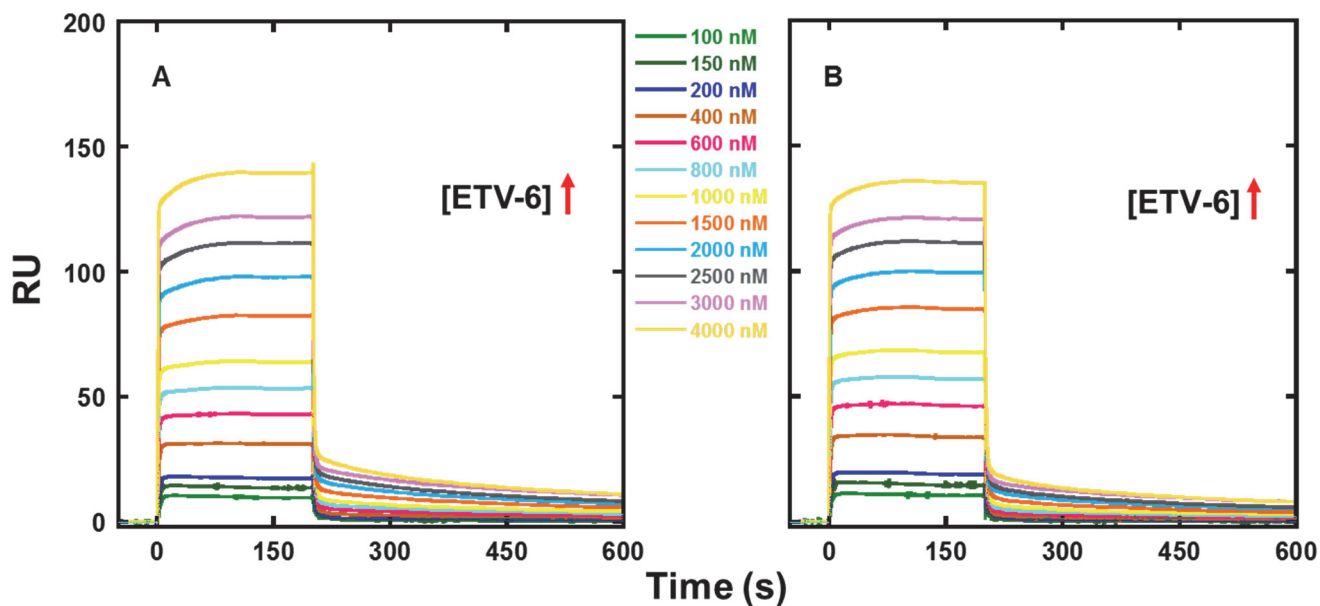

**Figure S1. Representative sensorgrams of DNA<sup>ns</sup> binding by the ETS domain of ETV6 to oligomeric nonspecific DNA.** A) SD1 and B) SD2 at 0.2 M Na<sup>+</sup>. ETV6 concentrations from 100 nM to 4 μM are shown in the figure legend. In each case, the association and dissociation rate were both rapid beyond the limit of the instrumental detection. At over 10<sup>-6</sup> M concentrations, ETV6 was sometimes observed to randomly adsorb the biosensor surface as shown in the sensorgrams, but was readily removed by washing after each cycle of injection.

## Supplemental References

1. De, S.; Chan, A. C.; Coyne, H. J., 3rd; Bhachech, N.; Hermsdorf, U.; Okon, M.; Murphy, M. E.; Graves, B. J.; McIntosh, L. P., Steric mechanism of auto-inhibitory regulation of specific and non-specific DNA binding by the ETS transcriptional repressor ETV6. *J Mol Biol* **2014**, *426* (7), 1390-406.
